# Supplementary material
Source: publisher figshare collection journal article supplement (https://acs.figshare.com/ndownloader/files/6990647)
Supplement: Supplementary file 1 [file 6990647]

## SUPPORTING INFORMATION

# Variable Doping Induces Mechanism Swapping in Electrogenerated Chemiluminescence of $\text{Ru}(\text{bpy})_3^{2+}$ Core-shell Silica Nanoparticles.

*Giovanni Valenti,<sup>1,‡</sup> Enrico Rampazzo,<sup>1,‡</sup> Sara Bonacchi,<sup>1,‡</sup> Luca Petrizza,<sup>1</sup> Massimo Marcaccio,<sup>1</sup>  
Marco Montalti,<sup>1</sup> Luca Prodi,<sup>1\*</sup> Francesco Paolucci<sup>1,2\*</sup>.*

<sup>1</sup>Department of Chemistry “Giacomo Ciamician”, University of Bologna, Via Selmi 2, 40126  
Bologna, Italy.

<sup>2</sup> ICMATE-CNR Bologna Associate Unit, University of Bologna, via Selmi 2, 40126, Bologna,  
Italy.

\* L.Pr. luca.prodi@unibo.it; F.P. francesco.paolucci@unibo.it

## **Table of contents**

|                                    |       |
|------------------------------------|-------|
| 1) <i>TEM analysis</i>             | p. 3  |
| 2) <i>DLS analysis</i>             | p. 6  |
| 3) <i>ζ-Potential Analysis</i>     | p. 10 |
| 3) <i>Adsorption spectra</i>       | p. 11 |
| 4) <i>Electrochemiluminescence</i> | p. 12 |

## 1) Transmission Electron Microscopy (TEM) analysis

TEM images of NPs samples were obtained with a Philips CM 100 microscope, operating at 80 kV, and using 3.05 mm copper grids (Formvar support film - 400 mesh). A drop of NIR-PluS NPs solution diluted with water (1:50) was placed on the grid and then dried under vacuum. The TEM images showing the denser silica cores, were analyzed with the ImageJ software. Histogram were fitted according to a Gaussian distribution obtaining the average diameter  $\pm$  SD for the silica nanoparticles core.

**Table S1:** NIR-PluS NPs silica core mean diameter  $\pm$  SD determined by TEM analysis.

| Sample | ( $d_{\text{core}} \pm \text{SD}$ ) [nm] |
|--------|------------------------------------------|
| Ru@NP1 | $10.2 \pm 1.4$                           |
| Ru@NP2 | $10 \pm 2$                               |
| Ru@NP3 | $11 \pm 3$                               |
| Ru@NP4 | $9 \pm 2$                                |
| Ru@NP5 | $9 \pm 2$                                |
| Ru@NP6 | $9.6 \pm 2.4$                            |

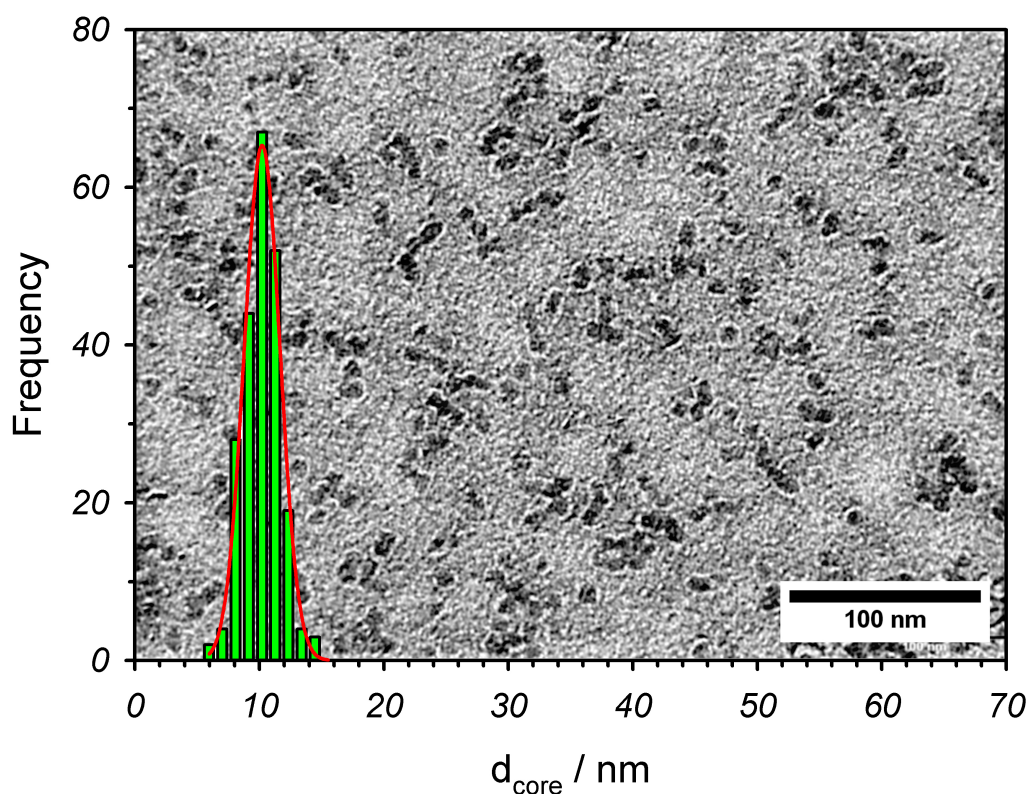

**Figure S1:** Ru@NP1, TEM image and silica core size distribution:  $d = (10.2 \pm 1.4)$  nm.

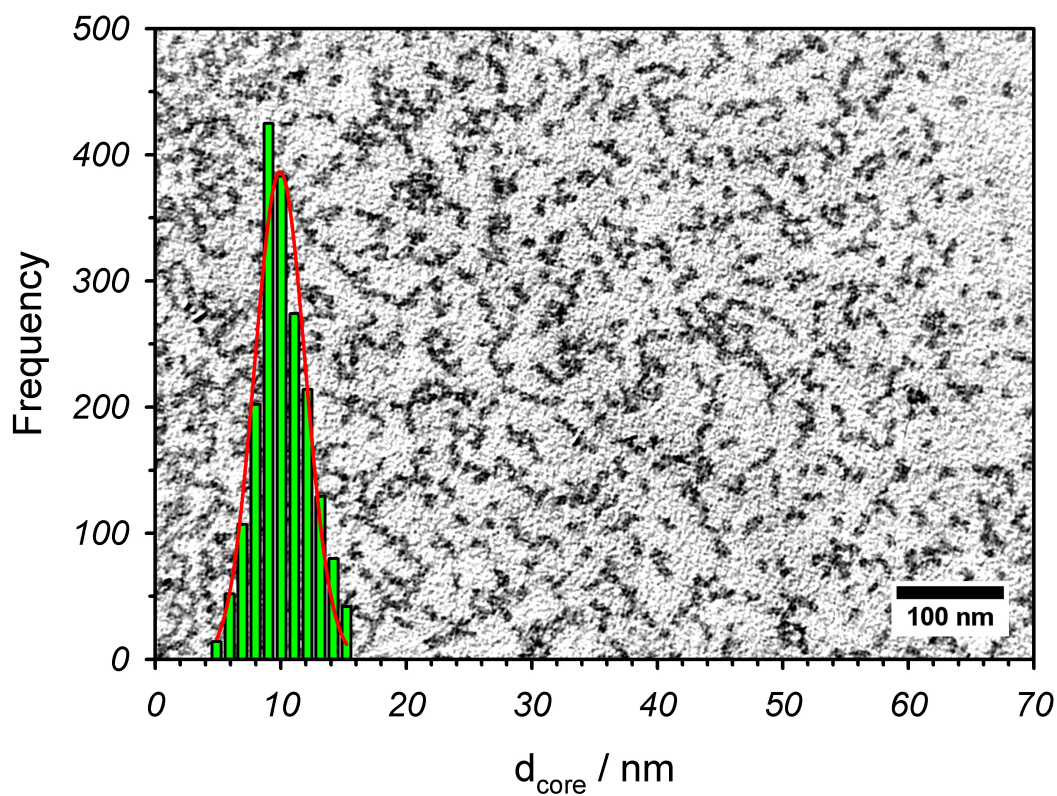

**Figure S2:** Ru@NP2, TEM image and silica core size distribution:  $d = (10 \pm 2)$  nm.

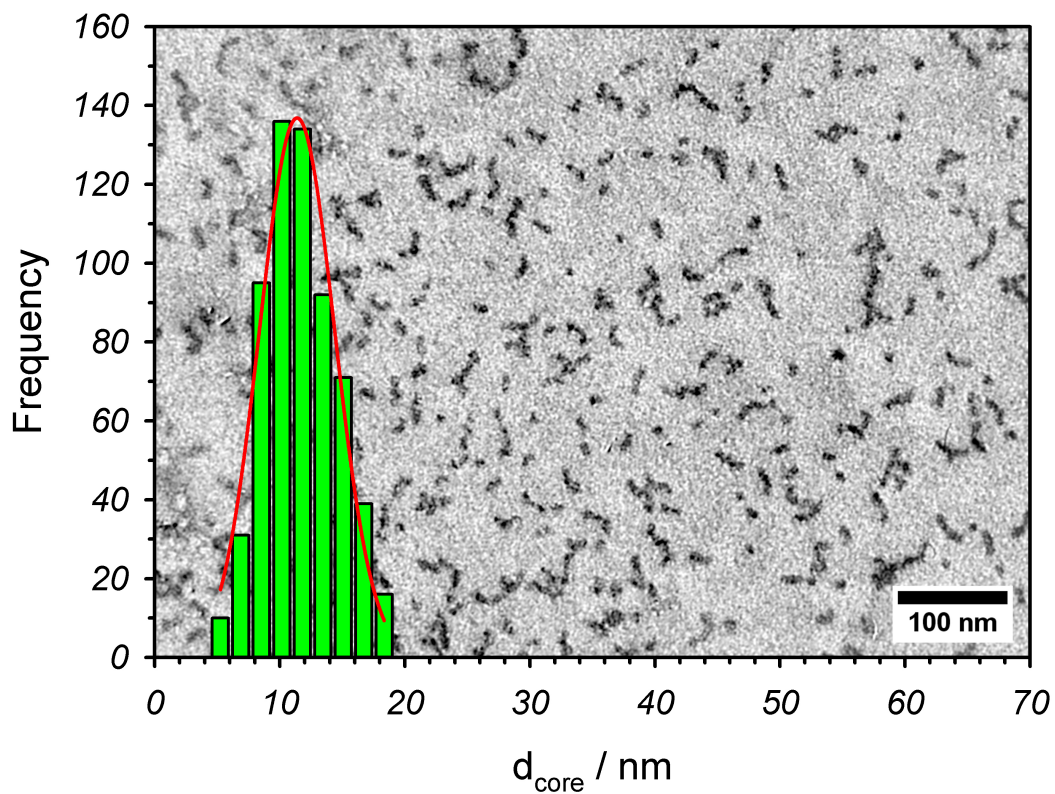

**Figure S3:** Ru@NP3, TEM image and silica core size distribution:  $d = (11 \pm 3)$  nm.

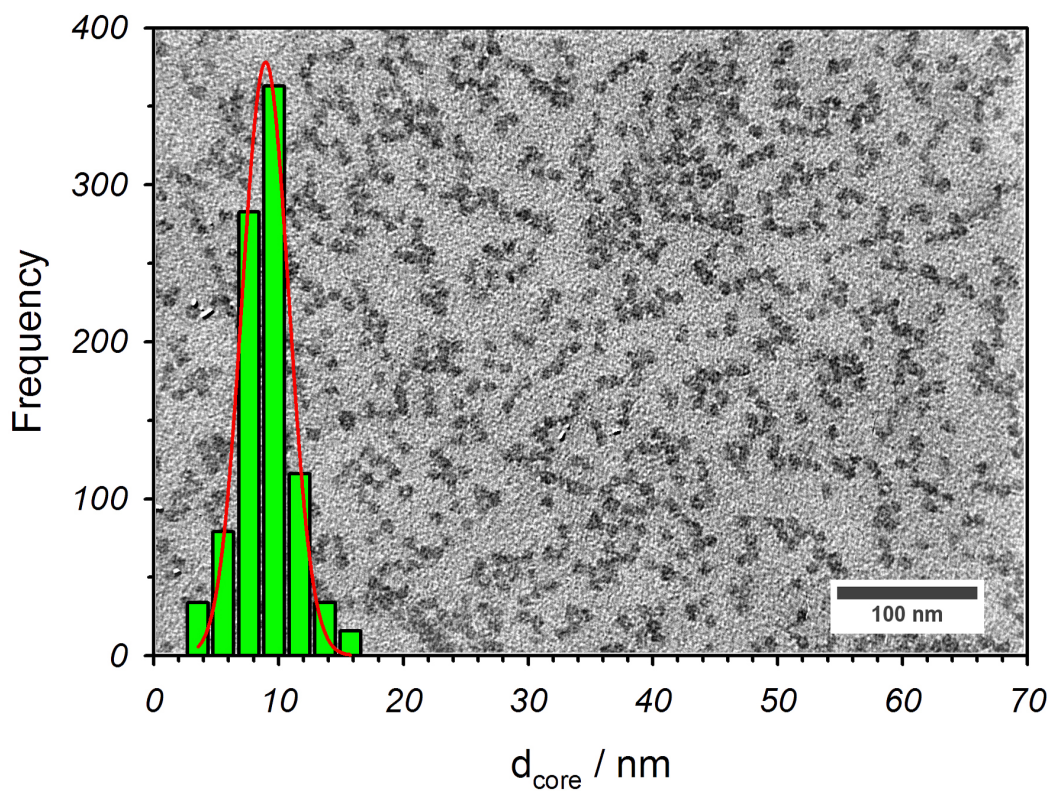

**Figure S4:** Ru@NP4, TEM image and silica core size distribution:  $d = (9 \pm 2)$  nm.

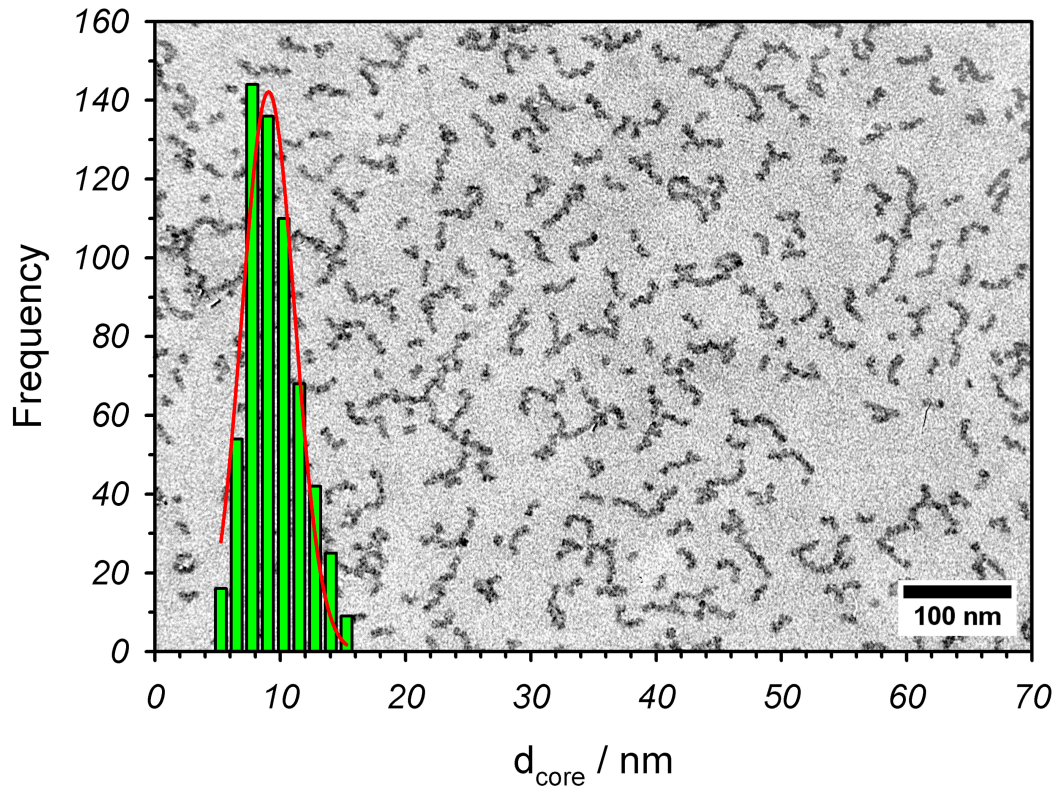

**Figure S5:** Ru@NP5, TEM image and silica core size distribution:  $d = (9 \pm 2)$  nm.

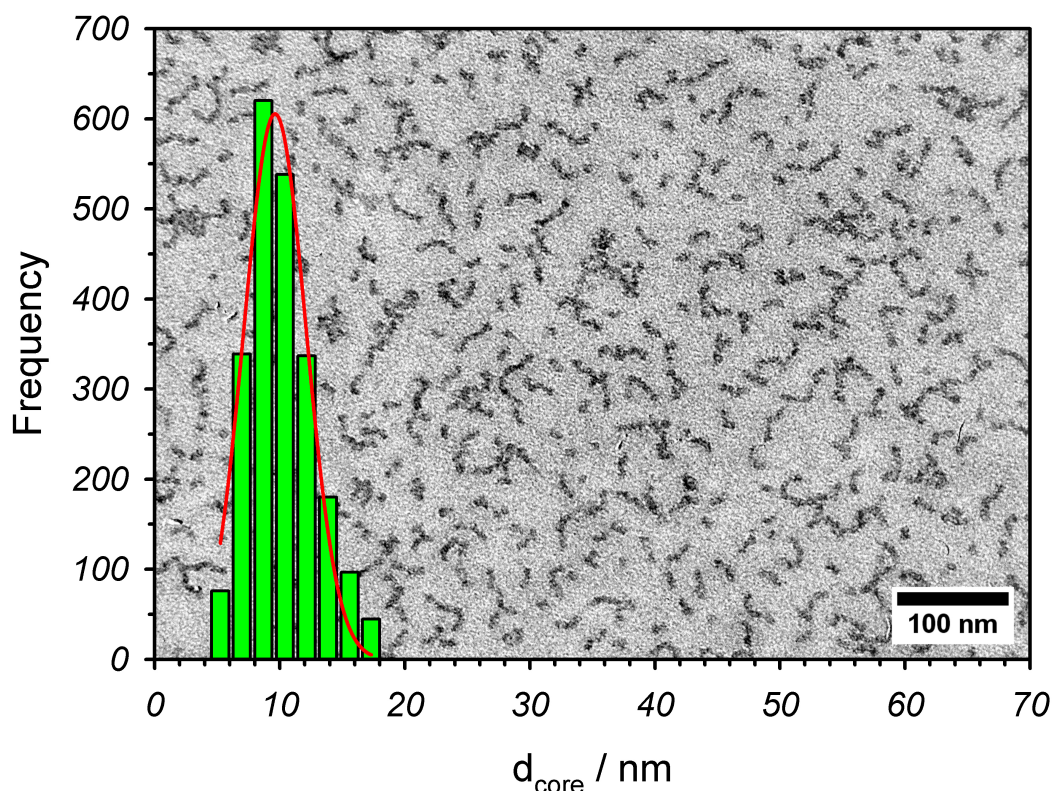

**Figure S6:** Ru@NP6, TEM image and silica core size distribution:  $d = (9.6 \pm 2.4)$  nm.

## 2) Dynamic Light Scattering (DLS) analysis

NPs hydrodynamic diameter ( $d_H$ ) distributions were obtained in water at 25°C through DLS measurements (Malvern Nano ZS instrument, 633 nm laser diode). Samples were filtered with 0.22  $\mu\text{m}$  RC filters and then housed in disposable polystyrene cuvettes of 1 cm optical path length, using water as solvent. The average width of DLS hydrodynamic diameter distribution is indicated by PDI (Polydispersity Index). In case of a mono-modal distribution (gaussian) calculated by means of cumulant analysis,  $\text{PDI} = (\sigma/Z_{\text{avg}})^2$ , where  $\sigma$  is the width of the distribution and  $Z_{\text{avg}}$  is average diameter of the particles population respectively. Standard deviation (SD) is calculated over five different measurements.

As shown by the TEM images, all the NIR-PluS NPs had very similar average silica core diameters. In some cases the average hydrodynamic diameter measured by DLS analysis was slightly higher than the expected average value (25-30 nm). The DLS technique over-weights the average size for a colloidal sample with moderate polydispersity (PDI = 0.2): for this reason the size distribution by number are showed to represent a more realistic picture of the hydrodynamic diameter of NPs in suspension.

**Table S2:** DLS Hydrodynamic diameter values in water for the nanoparticles samples described in this work. Standard deviation was calculated on five different measurements.

| <i>Sample</i> | $d_H \pm SD$ [nm] | <i>Pdl</i> |
|---------------|-------------------|------------|
| <b>Ru@NP1</b> | 19 ± 3            | 0.30       |
| <b>Ru@NP2</b> | 18 ± 5            | 0.24       |
| <b>Ru@NP3</b> | 27 ± 5            | 0.22       |
| <b>Ru@NP4</b> | 22 ± 3            | 0.15       |
| <b>Ru@NP5</b> | 35 ± 5            | 0.13       |
| <b>Ru@NP6</b> | 32 ± 6            | 0.17       |

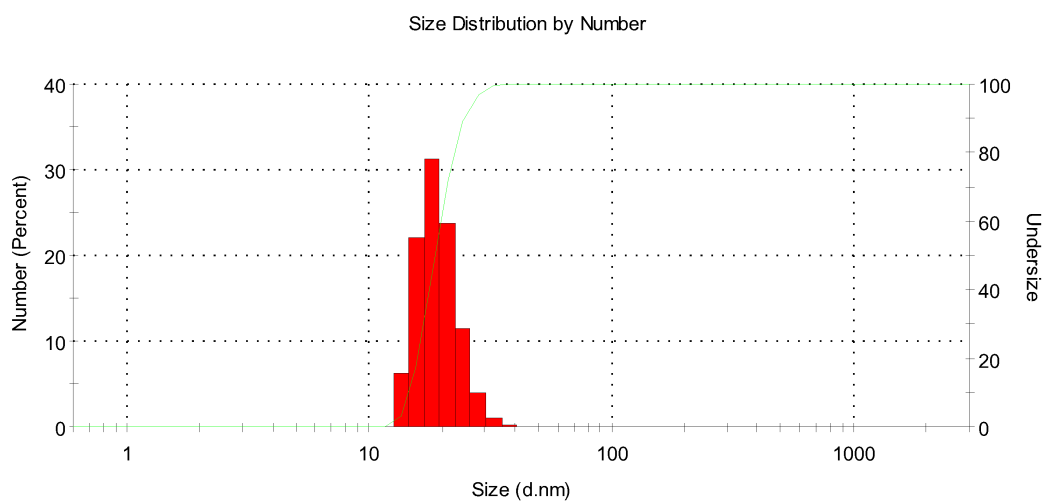

**Figure S7:** DLS diameter distribution by number of **Ru@NP1** ( $d_H = 19 \pm 3$  nm; water, 25°C).

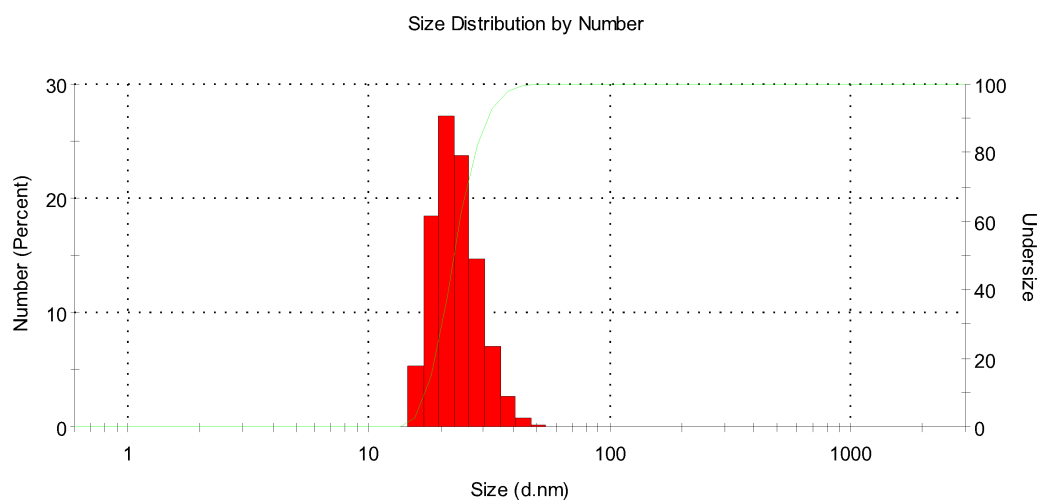

**Figure S8:** DLS diameter distribution by number of **Ru@NP2** ( $d_H = 18 \pm 5$  nm; water, 25°C).

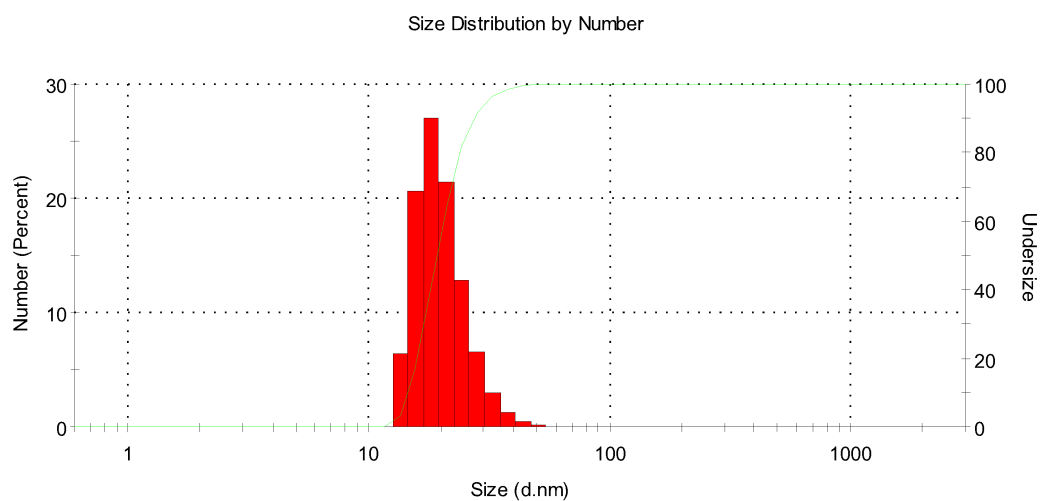

**Figure S9:** DLS diameter distribution by number of **Ru@NP3** ( $d_H = 27 \pm 5$  nm; water, 25°C).

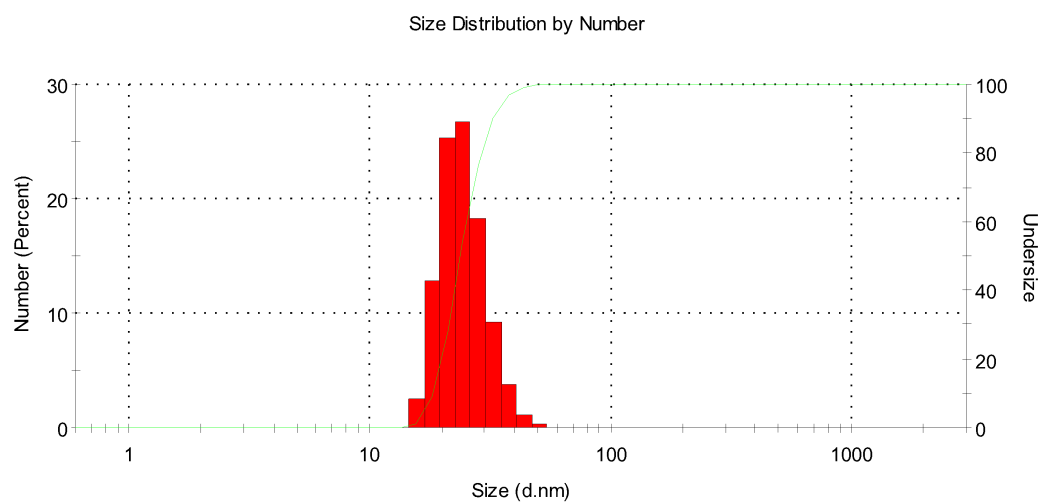

**Figure S10:** DLS diameter distribution by number of **Ru@NP4** ( $d_H = 22 \pm 3$  nm; water, 25°C).



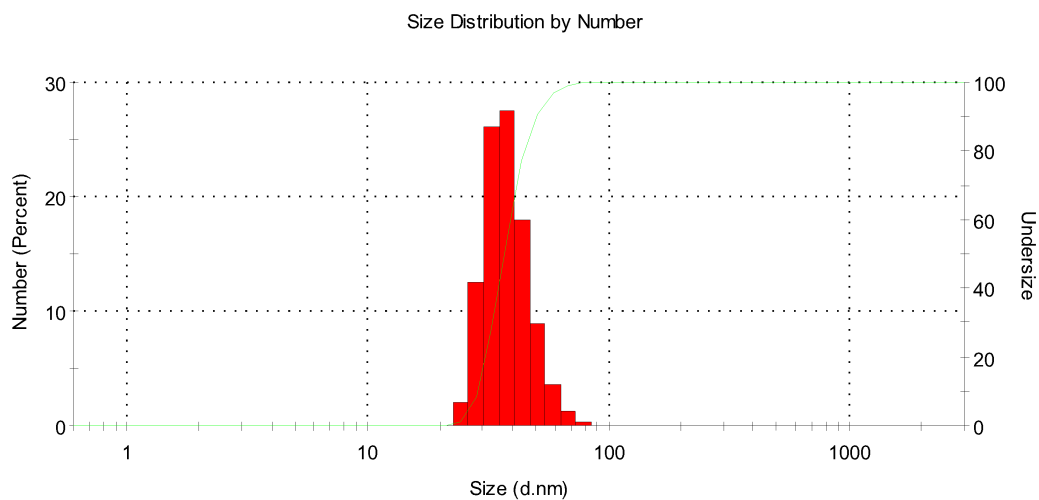

**Figure S11:** DLS diameter distribution by number of **Ru@NP5** ( $d_H = 35 \pm 5$  nm; water, 25°C).

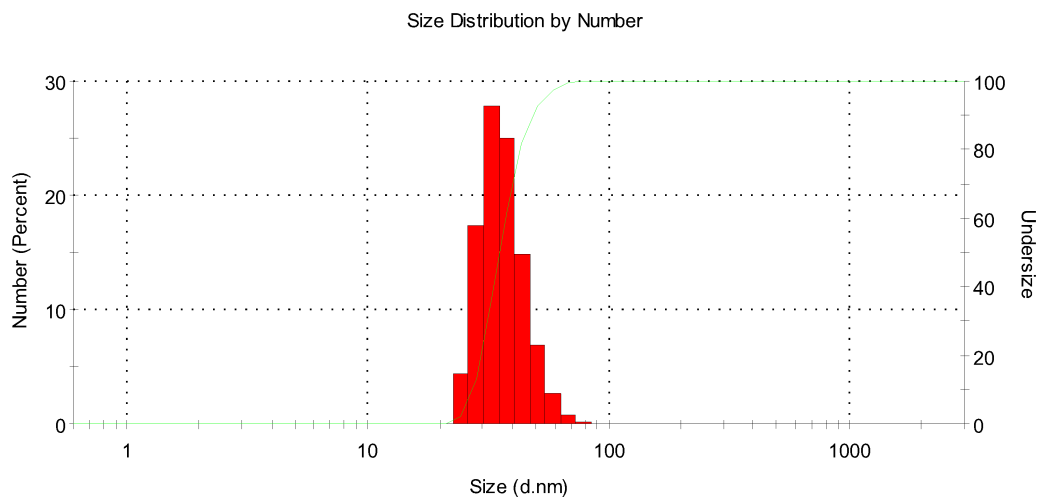

**Figure S12:** DLS diameter distribution by number of **Ru@NP6** ( $d_H = 32 \pm 6$  nm; water, 25°C).

## 2) $\zeta$ -Potential analysis

NPs  $\zeta$ -Potential values were obtained using a Malvern Nano ZS instrument equipped with a 633 nm laser diode. Samples were housed in disposable polycarbonate folded capillary cell (DTS1070, 750  $\mu$ L, 4 mm optical path length). Electrophoretic determination of  $\zeta$ -Potential was made using a auto-mode setup (Smoluchowski approximation) in aqueous media (conditions : [Ru@NP] = 4  $\mu$ M, [KCl] = 1 mM; [phosphate buffer] = 1 mM, pH 7.0, T = 25  $^{\circ}$ C, samples filtered with a 200 nm RC syringe filter).

**Table S3:**  $\zeta$ -Potential values in water for the nanoparticles samples described in this work. Standard deviation was calculated over ten different measurements.

| <i>Sample</i> | <i><math>\zeta</math>-Potential <math>\pm</math> SD (mV)</i> |
|---------------|--------------------------------------------------------------|
| <b>Ru@NP1</b> | -10.0 $\pm$ 1.5                                              |
| <b>Ru@NP2</b> | -6.3 $\pm$ 0.9                                               |
| <b>Ru@NP3</b> | -4.4 $\pm$ 1.0                                               |
| <b>Ru@NP4</b> | -2.5 $\pm$ 1.2                                               |
| <b>Ru@NP5</b> | -0.9 $\pm$ 0.7                                               |
| <b>Ru@NP6</b> | 0.9 $\pm$ 0.8                                                |

### 3) Absorption spectra

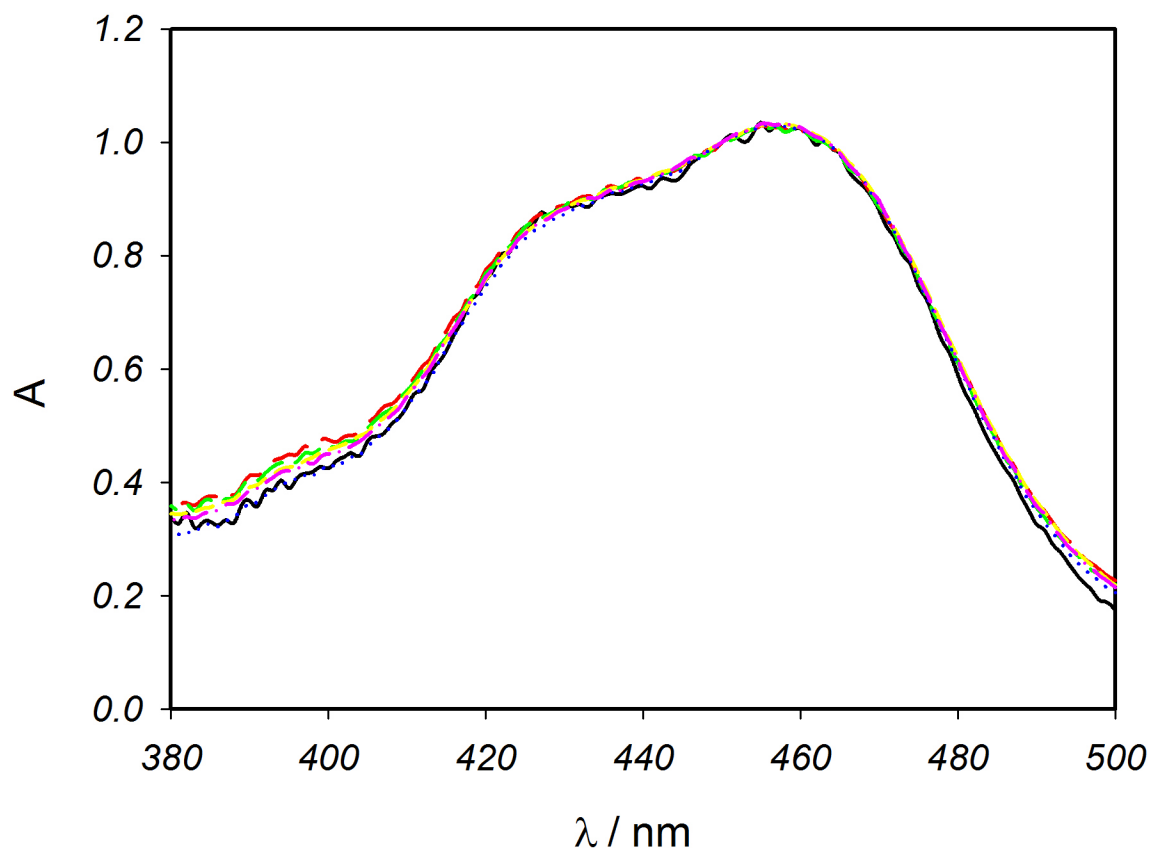

**Figure S13:** Normalized absorption spectra of samples **Ru@NP1-6**. Conditions: water,  $[\text{Ru@NP}] = 10 \mu\text{M}$  filtered with a RC 200  $\mu\text{m}$  filter.

#### 4) Electrochemiluminescence

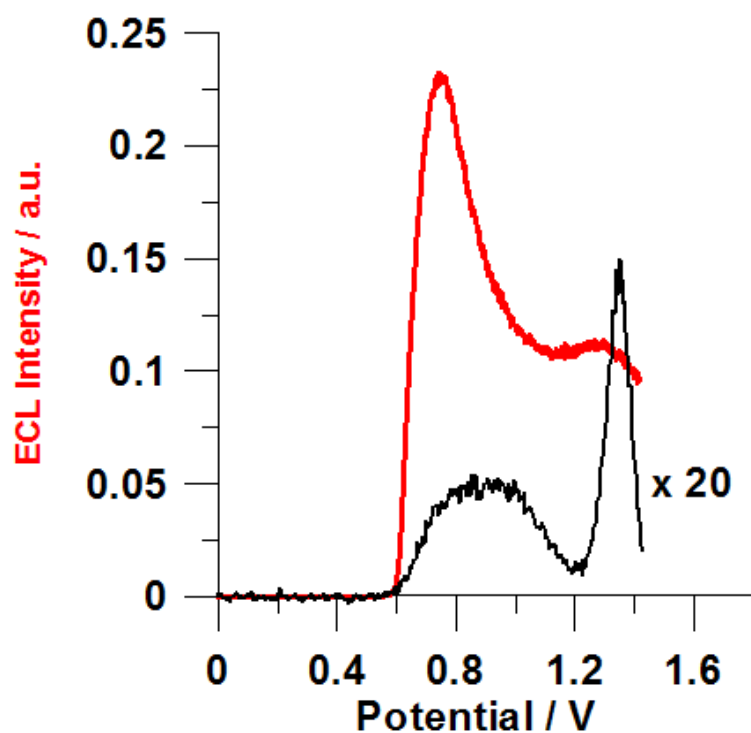

**Figure S14.** ECL intensity vs potential curves of **Ru@NP1** (Ru/NP = 2) in 100 mM PB solutions with 30 mM DBAE (red curve) or with 30 mM tripropylamine (black curve) as co-reactant; scan rate  $0.1 \text{ V s}^{-1}$  (E vs. SCE); PMT bias 750 V.

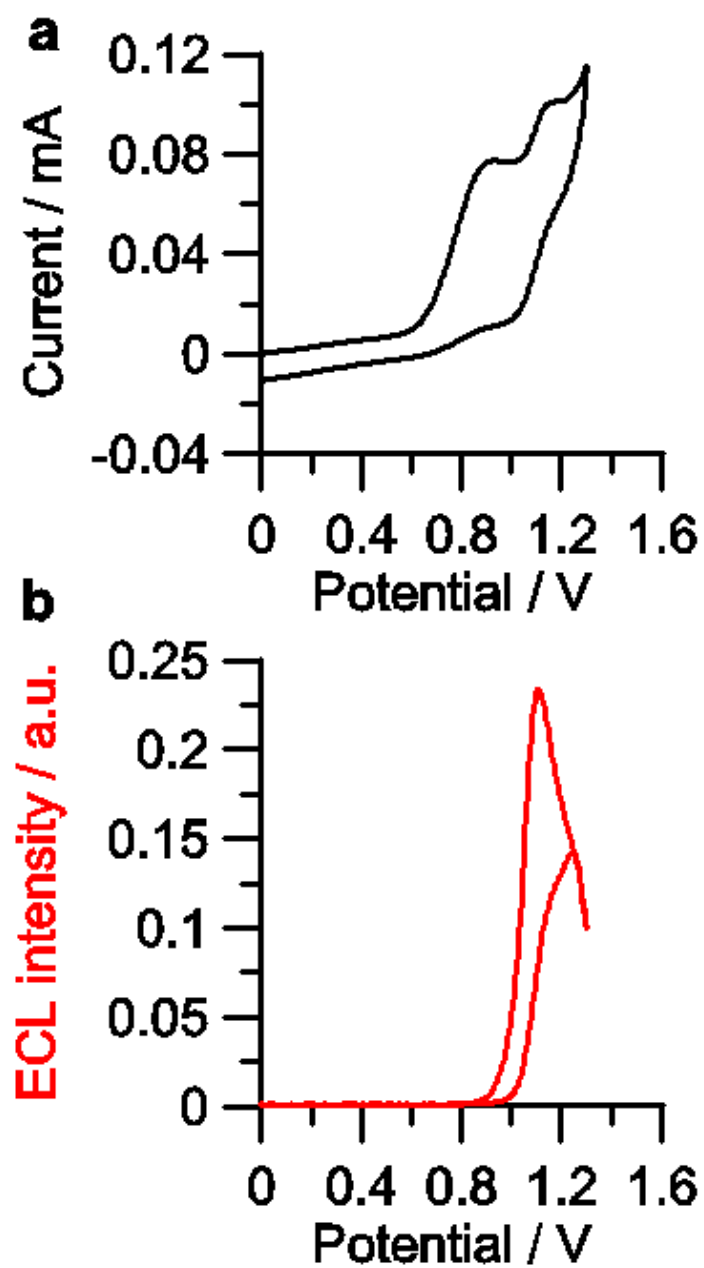

**Figure S15** Cyclic voltammetry (a) and ECL intensity (b) vs potential curves of  $\text{Ru}(\text{bpy})_3^{2+}$  320  $\mu\text{M}$  in 100 mM PB solutions, 30 mM DBAE as coreactant; scan rate 0.1  $\text{V s}^{-1}$  (E vs. SCE); PMT bias 750 V.

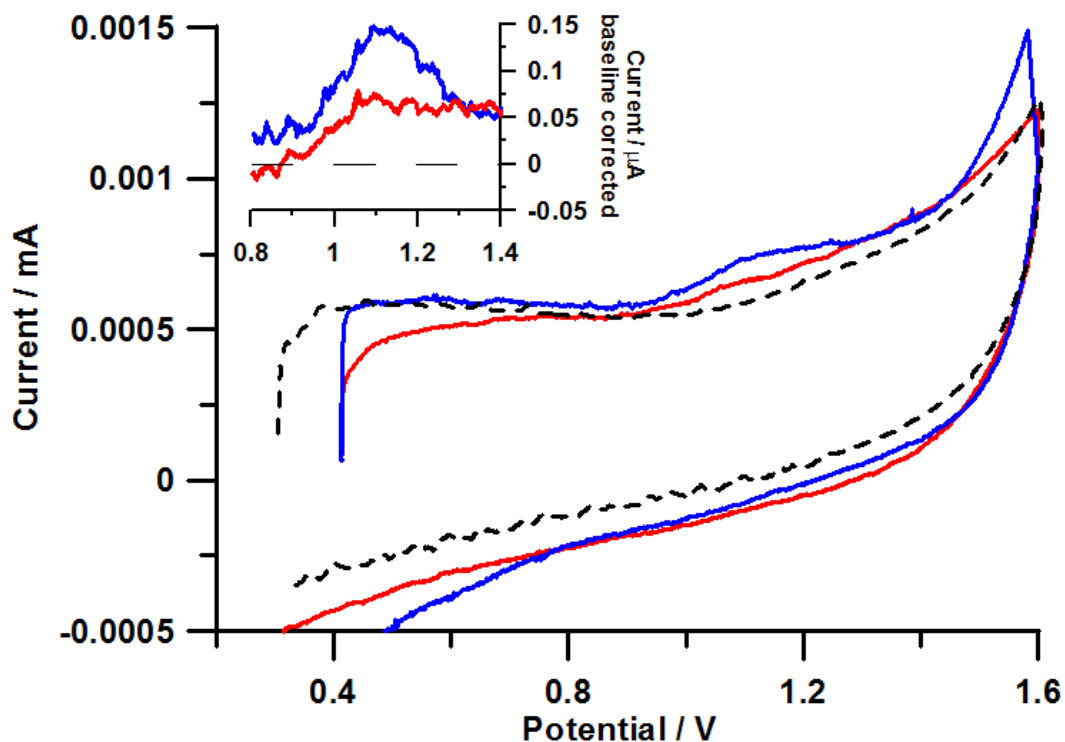

**Figure S16** Cyclic voltammetry of DDSNs with different doping (**Ru@NP3** red curve and **Ru@NP6** blue curve) and the pristine (ITO) electrode (black dashed curve). The DDSN samples were prepared on the substrate working electrode (ITO) by deposition of 10  $\mu\text{l}$  of the respective DDSN solution (water 80  $\mu\text{M}$ ). Those were then allowed to dry in the dark for at least 12 h and investigated by cyclic voltammetry in  $\text{CH}_3\text{CN}$  0.05 M  $\text{Bu}_4\text{NPF}_6$ . In the inset is reported the cyclic voltammetry corrected for the baseline of the pristine ITO electrode (dashed line in the main panel). Scan rate 10  $\text{mV s}^{-1}$  (E vs. SCE).

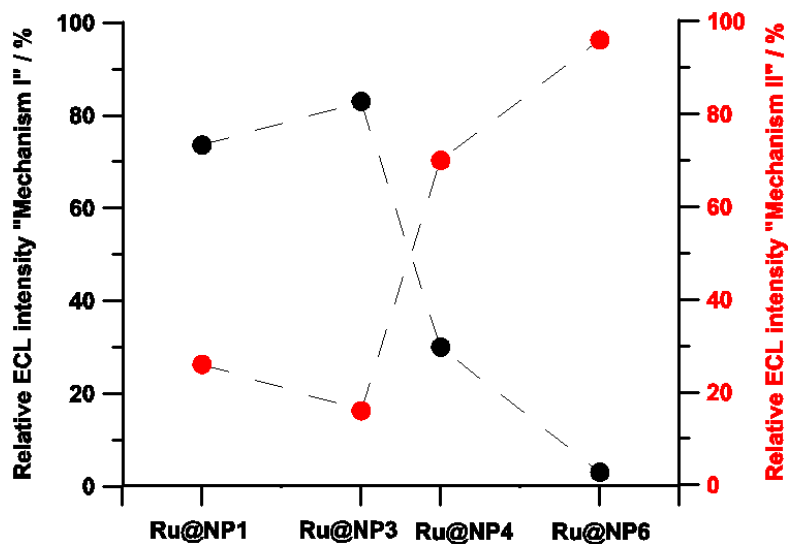

**Figure S17** Relative ECL intensity for DDSNs with different doping (2, 6, 16, 24). The intensities were obtained from figure 8 by integrating the ECL intensity related to the first (black dots) or to the second (red dots) ECL peak and normalize for the whole ECL emission. Conditions: 100 mM PB solutions, 30 mM DBAE as coreactant; applied potential 1.4 V for 0.5 sec. (E vs. SCE); PMT bias 750 V.

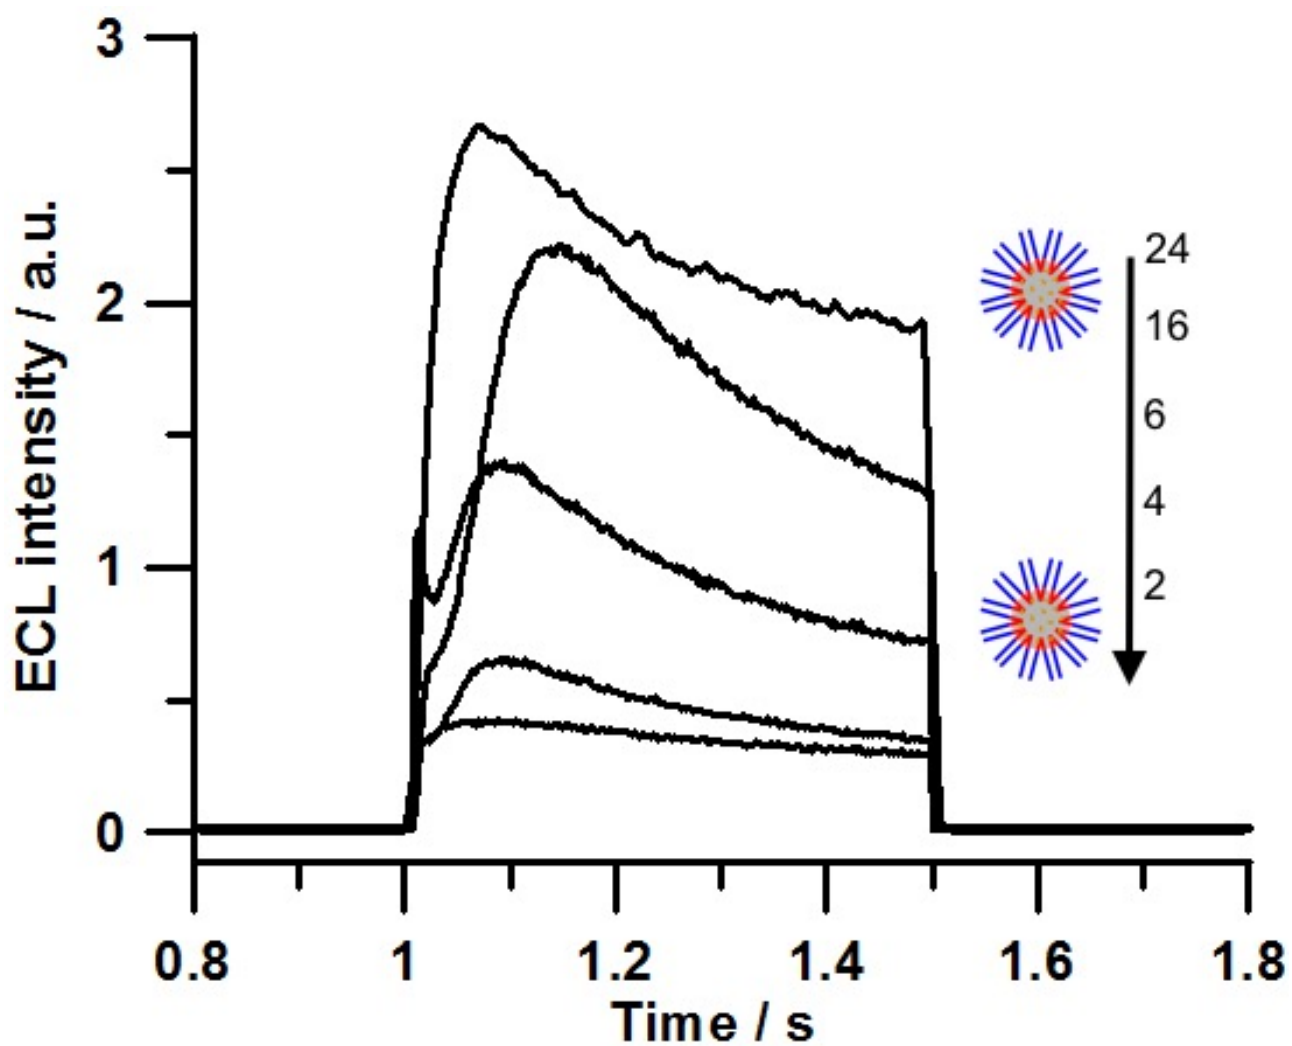

**Figure S18** ECL emission vs time of DDSNs with different doping (2, 4, 6, 20, 24). Conditions: 100 mM PB solutions, 30 mM DBAE as coreactant; applied potential 1.4 V for 0.5 sec. (E vs. SCE); PMT bias 750 V.
